# Supplementary material
Source: Springer Nature journal article supplement (https://www.springermedizin.de/resource/supplementary/12913_2009_1148_MOESM3_ESM.pdf/9527686)

# Incremental cost-effectiveness of vaccination (US\$/QALY)

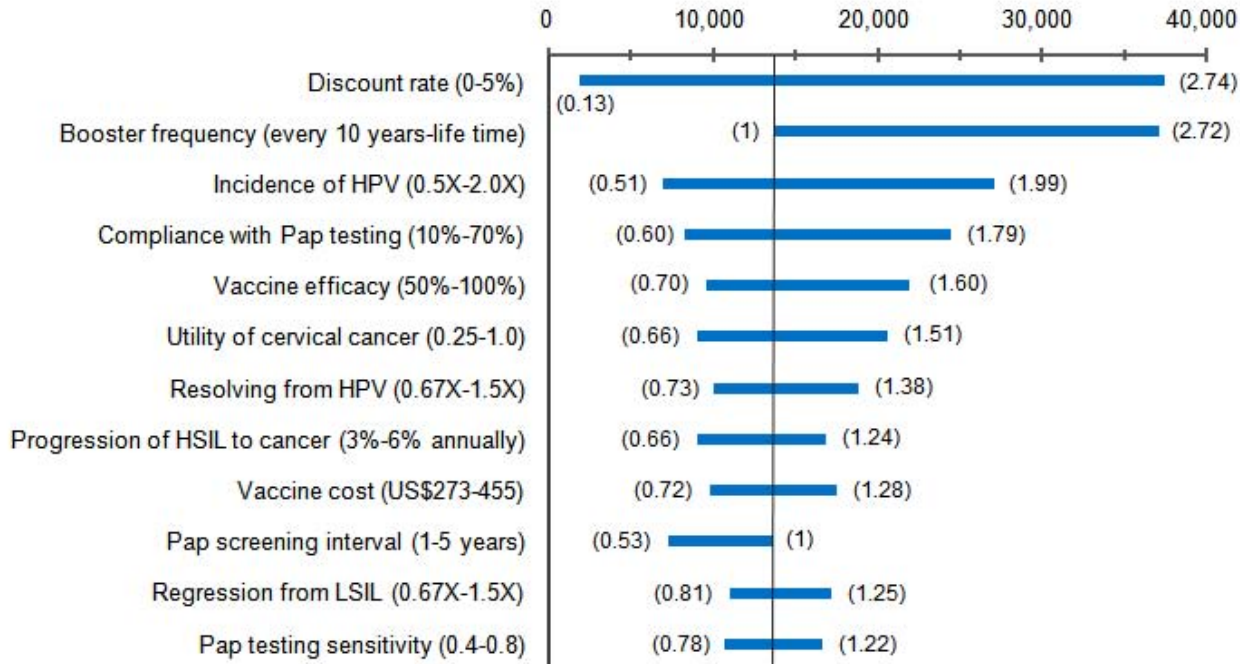

Supplement: MOESM3 [file 9527686]
